# Supplementary material for: The Osmotin-Like Protein Gene PdOLP1 Is Involved in Secondary Cell Wall Biosynthesis during Wood Formation in Poplar
Source: PubMed Central journal article supplement (PMC7312728; doi:10.3390/ijms21113993), 2020-06-02
Supplement: ijms-21-03993-s001.pdf [file ijms-21-03993-s001.pdf]

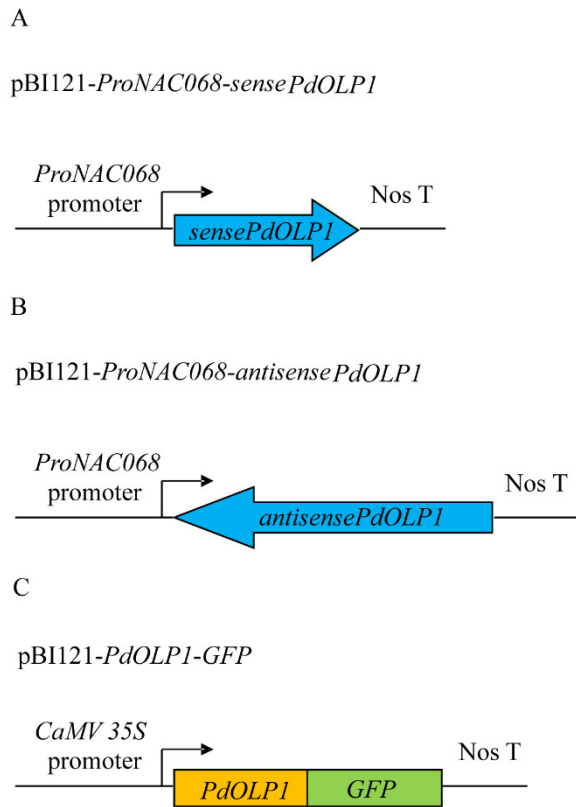

Figure S1. Recombinant vector map of various constructs used for genetic transformation. (A) Construction of the pBI121-*ProNAC068*-sense *PdOLP1* vector overexpressing the poplar *PdOLP1* gene; (B) Construction of the pBI121-*ProNAC068*-antisense *PdOLP1* vector expressing the antisense poplar *PdOLP* gene; (C) Construction of the pBI121-*PdOLP1*-GFP vector expressing the *PdOLP1*-GFP fusion protein.

```

PdOLP1 : ---MTAR---PIFACAFVILCLFHAARPELITLVNNCPTIYPAIQPNAGHPVLEKGGFPLTLTHRSFRAPDQWSGRI : 77
PagOLP1 : ---MATAK---PIFACAFVILCLFHAARPELITLVNNCPTIYPAIQPNAGHPVLEKGGFPLTLTHRSFRAPDQWSGRI : 77
PagOLP3 : ---MATAK---PIFACAFVILCLFHAARPELITLVNNCPTIYPAIQPNAGHPVLEKGGFPLTLTHRSFRAPDQWSGRI : 77
PtrOLP : ---MTAR---PIFACAFVILCLFHAARPELITLVNNCPTIYPAIQPNAGHPVLEKGGFPLTLTHRSFRAPDQWSGRI : 77
PouOLP : ---MTAR---PIFACAFVILCLFHAARPELITLVNNCPTIYPAIQPNAGHPVLEKGGFPLTLTHRSFRAPDQWSGRI : 77
PdOLP2 : ---MADAT---QLFTCALISCLFHVAREPELITLVNNCPTIYPAIQPNAGHPVLEKGGFPLTLTHRSFRAPDQWSGRI : 77
PagOLP2 : ---MADAT---QLFTCALISCLFHVAREPELITLVNNCPTIYPAIQPNAGHPVLEKGGFPLTLTHRSFRAPDQWSGRI : 77
PagOLP4 : ---MADAT---QLFTCALISCLFHVAREPELITLVNNCPTIYPAIQPNAGHPVLEKGGFPLTLTHRSFRAPDQWSGRI : 77
PtoOLP : ---MADAT---QLFTCALISCLFHVAREPELITLVNNCPTIYPAIQPNAGHPVLEKGGFPLTLTHRSFRAPDQWSGRI : 77
HbOLP : ---MAAT---LFFFSIT-TLTLISQATPPGVOGLITLVNNCPTIYPAIQPNAGHPVLEKGGFPLTLTHRSFRAPDQWSGRI : 78
JcOLP : ---MADAT---VLFSTISTALFVLSFGQAMP---LTLTLVNNCPTIYPAIQPNAGHPVLEKGGFPLTLTHRSFRAPDQWSGRI : 78
VfOLP : ---MKMT---LFFSAISATFVILCLFQATPPGGLITLVNNCPTIYPAIQPNAGHPVLEKGGFPLTLTHRSFRAPDQWSGRI : 80
MeOLP : ---MAAPKPPMFFSTITVTLTLFQATPHGVOGLITLVNNCPTIYPAIQPNAGHPVLEKGGFPLTLTHRSFRAPDQWSGRI : 82
RcOLP : MAYSSAITALLFYSTIT-TLTSFSQATPP---GLTLTLVNNCPTIYPAIQPNAGHPVLEKGGFPLTLTHRSFRAPDQWSGRI : 82

```

\*\*\*\*\*

```

PdOLP1 : WERTGCCHSNGKFCQATGDCNRIECNGLGGAPATLAAQTLHHGHKDFSSYGVSLVDGPNLPMVTTPHEGKGVCPVVGCRANLLS : 163
PagOLP1 : WERTGCCHSNGKFCQATGDCNRIECNGLGGAPATLAAQTLHHGHKDFSSYGVSLVDGPNLPMVTTPHEGKGVCPVVGCRANLLS : 163
PagOLP3 : WERTGCCHSNGKFCQATGDCNRIECNGLGGAPATLAAQTLHHGHKDFSSYGVSLVDGPNLPMVTTPHEGKGVCPVVGCRANLLS : 163
PtrOLP : WERTGCCHSNGKFCQATGDCNRIECNGLGGAPATLAAQTLHHGHKDFSSYGVSLVDGPNLPMVTTPHEGKGVCPVVGCRANLLS : 163
PouOLP : WERTGCCHSNGKFCQATGDCNRIECNGLGGAPATLAAQTLHHGHKDFSSYGVSLVDGPNLPMVTTPHEGKGVCPVVGCRANLLS : 163
PdOLP2 : WERTGCCHSNGKFCQATGDCNRIECNGLGGAPATLAAQTLHHGHKDFSSYGVSLVDGPNLPMVTTPHEGKGVCPVVGCRANLLS : 163
PagOLP2 : WERTGCCHSNGKFCQATGDCNRIECNGLGGAPATLAAQTLHHGHKDFSSYGVSLVDGPNLPMVTTPHEGKGVCPVVGCRANLLS : 163
PagOLP4 : WERTGCCHSNGKFCQATGDCNRIECNGLGGAPATLAAQTLHHGHKDFSSYGVSLVDGPNLPMVTTPHEGKGVCPVVGCRANLLS : 163
PtoOLP : WERTGCCHSNGKFCQATGDCNRIECNGLGGAPATLAAQTLHHGHKDFSSYGVSLVDGPNLPMVTTPHEGKGVCPVVGCRANLLS : 163
HbOLP : WARTGCCHSNGKFCQATGDCNRIECNGLGGAPATLAAQTLHHGHKDFSSYGVSLVDGPNLPMVTTPHEGKGVCPVVGCRANLLS : 164
JcOLP : WARTGCCHSNGKFCQATGDCNRIECNGLGGAPATLAAQTLHHGHKDFSSYGVSLVDGPNLPMVTTPHEGKGVCPVVGCRANLLS : 164
VfOLP : WERTGCCHSNGKFCQATGDCNRIECNGLGGAPATLAAQTLHHGHKDFSSYGVSLVDGPNLPMVTTPHEGKGVCPVVGCRANLLS : 166
MeOLP : WARTGCCHSNGKFCQATGDCNRIECNGLGGAPATLAAQTLHHGHKDFSSYGVSLVDGPNLPMVTTPHEGKGVCPVVGCRANLLS : 168
RcOLP : WARTGCCHSNGKFCQATGDCNRIECNGLGGAPATLAAQTLHHGHKDFSSYGVSLVDGPNLPMVTTPHEGKGVCPVVGCRANLLS : 168

```

.....

```

PdOLP1 : TCPDELKRSRSP--AGVVGCKSGCCAFGTDELCCRNHYNSPQTCRASSFSEFFKHACPATFTYAHDPSLMHECSSPRELKVIFCH : 247
PagOLP1 : TCPDELKRSRSP--AGVVGCKSGCCAFGTDELCCRNHYNSPQTCRASSFSEFFKHACPATFTYAHDPSLMHECSSPRELKVIFCH : 247
PagOLP3 : TCPDELKRSRSP--AGVVGCKSGCCAFGTDELCCRNHYNSPQTCRASSFSEFFKHACPATFTYAHDPSLMHECSSPRELKVIFCH : 247
PtrOLP : TCPDELKRSRSP--AGVVGCKSGCCAFGTDELCCRNHYNSPQTCRASSFSEFFKHACPATFTYAHDPSLMHECSSPRELKVIFCH : 247
PouOLP : TCPDELKRSRSP--AGVVGCKSGCCAFGTDELCCRNHYNSPQTCRASSFSEFFKHACPATFTYAHDPSLMHECSSPRELKVIFCH : 247
PdOLP2 : TCPDELKRSRSLGRHGIVVCGKSGCCAFGTDELCCRNHYNSPQTCRASSFSEFFKHACPATFTYAHDPSLMHECSSPRELKVIFCH : 249
PagOLP2 : TCPDELKRSRSLGRHGIVVCGKSGCCAFGTDELCCRNHYNSPQTCRASSFSEFFKHACPATFTYAHDPSLMHECSSPRELKVIFCH : 249
PagOLP4 : TCPDELKRSRSLGRHGIVVCGKSGCCAFGTDELCCRNHYNSPQTCRASSFSEFFKHACPATFTYAHDPSLMHECSSPRELKVIFCH : 249
PtoOLP : TCPDELKRSRSLGRHGIVVCGKSGCCAFGTDELCCRNHYNSPQTCRASSFSEFFKHACPATFTYAHDPSLMHECSSPRELKVIFCH : 249
HbOLP : TCPDELKRSRSLGRHGIVVCGKSGCCAFGTDELCCRNHYNSPQTCRASSFSEFFKHACPATFTYAHDPSLMHECSSPRELKVIFCH : 250
JcOLP : TCPDELKRSRSLGRHGIVVCGKSGCCAFGTDELCCRNHYNSPQTCRASSFSEFFKHACPATFTYAHDPSLMHECSSPRELKVIFCH : 250
VfOLP : TCPDELKRSRSLGRHGIVVCGKSGCCAFGTDELCCRNHYNSPQTCRASSFSEFFKHACPATFTYAHDPSLMHECSSPRELKVIFCH : 252
MeOLP : TCPDELKRSRSLGRHGIVVCGKSGCCAFGTDELCCRNHYNSPQTCRASSFSEFFKHACPATFTYAHDPSLMHECSSPRELKVIFCH : 254
RcOLP : TCPDELKRSRSLGRHGIVVCGKSGCCAFGTDELCCRNHYNSPQTCRASSFSEFFKHACPATFTYAHDPSLMHECSSPRELKVIFCH : 254

```

Figure S2. ClustalW alignment of the amino acid sequences of PdOLP1, and its homologous proteins.

The GenBank accession number for PdOLP1: MK052942; PdOLP2: Podel.01G248000.1; PagOLP1: Pop\_G09G014129.T1; PagOLP2: Pop\_A01G056866.T1; PagOLP3: Pop\_A09G059600.T1; PagOLP4: Pop\_G01G020795.T1; PtrOLP: XP\_024463852.1; PouOLP: XP\_011042680.1; PtoOLP: APA20308.1; MeOLP: XP\_021626825.1; HbOLP: XP\_021636655.1; RcOLP: XP\_002531364.1; VfOLP: ARV78462.1; JcOLP: XP\_012065012.1. “\*” is used to indicate the AWS domain, “-” indicates the THN domain, and the “.” means the FU domain, which involved in the mechanism of signal transduction by receptor tyrosine kinases.

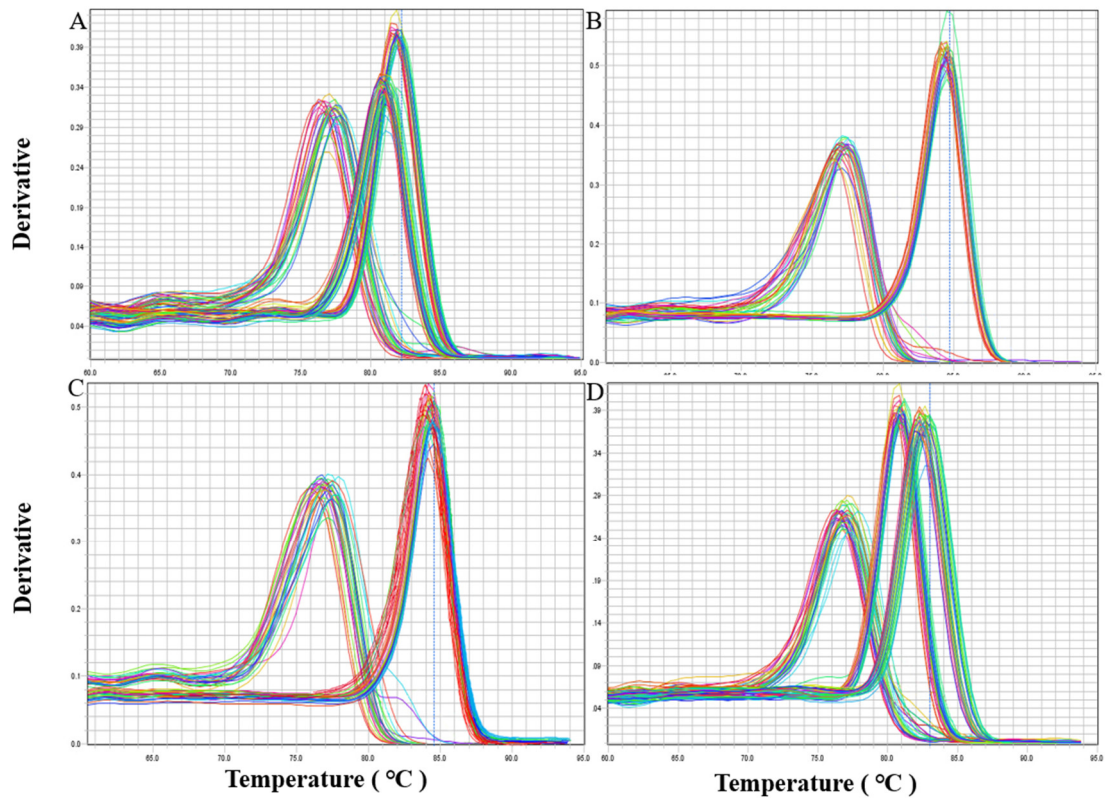

Figure S3. Melting curves of eight secondary cell wall biosynthesis genes. The left, middle and right melting curves of figure A represents the tested genes *PtrFRA1*, *PtrC4H1* and *PtrCCoAOMT1*, respectively.

The left and right melting curves of figure B represents the tested genes *TUA1* and *PtrCAD10*, respectively.

The left and right melting curves of figure C represents the tested genes *PtrTUB7* and *PtrMYB90*, respectively.

The left, middle and right melting curves of figure D represents the tested genes *UBQ1*, *PtrSuS1* and *Ptr4CL3*, respectively.

Figure S4. Standard curves of eight secondary cell wall biosynthesis genes.

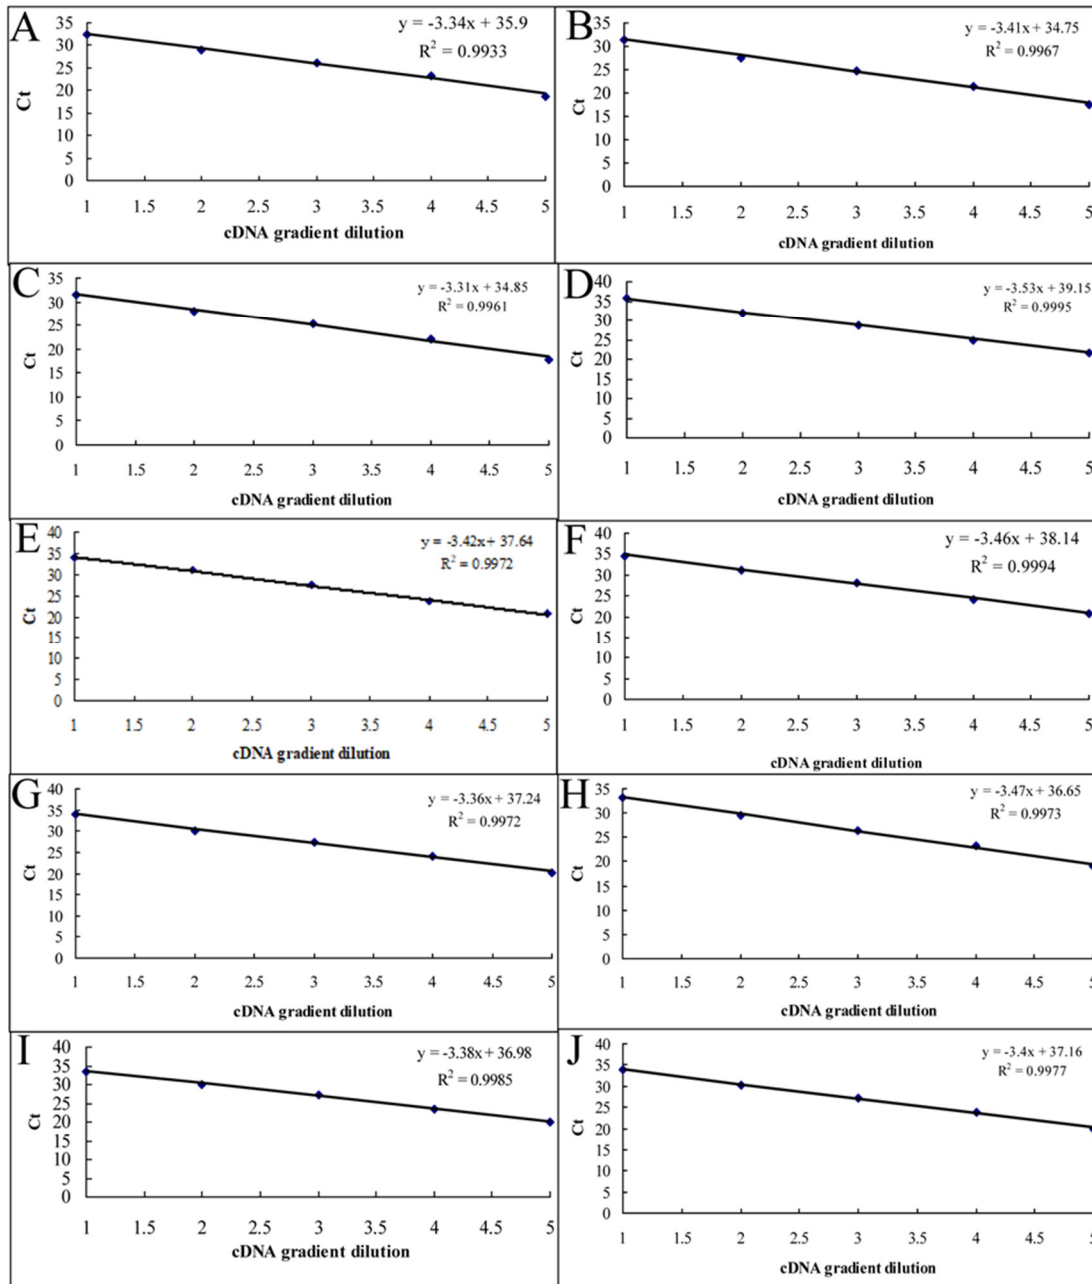

Figure A shows the standard curve of *PtrC4H1*.  
 Figure B shows the standard curve of *PtrCAD10*.  
 Figure C shows the standard curve of *PtrCCoAOMT1*.  
 Figure D shows the standard curve of *Ptr4CL3*.  
 Figure E shows the standard curve of *PtrMYB90*.  
 Figure F shows the standard curve of *PtrSuS1*.  
 Figure G shows the standard curve of *PtrTUB7*.  
 Figure H shows the standard curve of *PtrFRA1*.  
 Figure I shows the standard curve of *TUA1*.  
 Figure J shows the standard curve of *UBQ1*.

Table S1. Details of the samples isolated from *Populus deltoides*.

| Name                   | Description                                                                                                                                                                                                                                                                                  | Collection Date |
|------------------------|----------------------------------------------------------------------------------------------------------------------------------------------------------------------------------------------------------------------------------------------------------------------------------------------|-----------------|
| <b>Immature xylem</b>  | Collected from a vigorously developing <i>Populus deltoides</i> Marsh tree in a field near the Chinese Academy of Forestry. Bark was peeled and four to eight partially lignified cell layers were shaved off from the wood side at chest height. Samples were scraped into liquid nitrogen. | 2009/8/20       |
| <b>Immature phloem</b> | The bark was peeled and four to eight cell layers from the bark side representing immature phloem were scraped into liquid nitrogen.                                                                                                                                                         | 2009/8/20       |
| <b>Mature phloem</b>   | Isolated from the bark side, nearer to the pith than immature phloem. Exists inside of and is stiffer than immature phloem. Scraped into liquid nitrogen.                                                                                                                                    | 2009/8/20       |
| <b>Mature xylem</b>    | Isolated from the exposed wood core, closer to the pith. Most rigid vascular tissue. Scraped into liquid nitrogen.                                                                                                                                                                           | 2009/8/20       |
| <b>Leaf bud</b>        | Very short internodes of the central branches (not apex), not the developmental branches. Initiate from leaf primordia and form branches and mature leaves after blooming.                                                                                                                   | 2009/8/20       |
| <b>Male flower bud</b> | Terminal buds of shoot apex/tips of a 15-year-old adult male tree. Prerequisite for floral/flower initiation or differentiation during the growth stage.                                                                                                                                     | 2009/8/20       |

Table S2. Sequences of the sense and antisense probes used for in situ hybridization.

| Antisense RNA probe (5'-3')    | Sense RNA probe (5'-3')        |
|--------------------------------|--------------------------------|
| CGTGGTGGAGGGTAATCTGTGCCAAAGCGG | CCGCTTTGGCACAGATTACCCTCCACCACG |

Table S3. Primers used for vector construct and expression analysis.

| Primer name | Forward primer (5'-3')               | Reverse primer (5'-3')                     |
|-------------|--------------------------------------|--------------------------------------------|
| P1          | ATGACTACTGCTAGGCCAAT                 | TTAGTGACAAAAGATAACTTTA                     |
| P2          | CTAGAGTCGACCTGCAGACGGCCCGGGCTGGTATCC | CCTCAGATCTACCATGGTTTTTCCTTTTGGTTCAAGA<br>G |

|     |                                                           |                                                           |
|-----|-----------------------------------------------------------|-----------------------------------------------------------|
| P3  | CATTTGGAGAGAACACGGGGGACTCTAGAATGACTACT<br>GCTAGGCCAATCT   | TGTTTGAACGATCGGGGAAATTCGAGCTCTTAGTGA<br>CAAAAGATAACCTTAAG |
| P4  | CATTTGGAGAGAACACGGGGGACTCTAGATTAGTGACA<br>AAAGATAACCTTAAG | TGTTTGAACGATCGGGGAAATTCGAGCTCATGACTA<br>CTGCTAGGCCAATCT   |
| P5  | TCCGGCCGCTTGGGTGGAGAG                                     | CTGGCGCGAGCCCCTGATGCT                                     |
| P6  | GCCCTGTGGTAGGTTGC                                         | TGCGGACTGTTGTAATGGTT                                      |
| P7  | AGGTTCTGGTTTGGGGTCTT                                      | TTGTCCAAAAGCACAGCAAC                                      |
| P8  | GTTGATTTTTGCTGGGAAGC                                      | GATCTTGGCCTTCACGTTGT                                      |
| P9  | ATGGATAACTCATCCTGGGTT                                     | TCACCACTTTGTGTGATTTTGC                                    |
| P10 | ATGGCATTTCGCGGCTATGAATC                                   | TCAGCATCCAGGTCCAATAGT                                     |
| P11 | ATGCACGAGGATTACAAGTG                                      | TCATGTTCTAAGTAGCTCTGC                                     |
| P12 | ATGCATATGGCTACCTATTATAC                                   | TCAAGCTACGAAATCATGAAAC                                    |
| P13 | ATGTCTCTCGACTGTCTACGCT                                    | TTAGGTCATGCATTAAGTAGGAC                                   |
| P14 | GGCCTCTAGAATGACTACTGCTAGGCCAAT                            | GGCGGTACCTTAGTGACAAAAGATAACTTTA                           |

Note:

- (1) Primer pair of P1 for amplifying the coding region of *PdOLP1* from cDNA of *P. deltooides*, and Primer of P2 for amplifying the promoter fragments of *PdOLP1* from *P. deltooides*;
- (2) Primer pair of P3 and P4 for amplifying the sense and antisense *PdOLP1* from cDNA of *P. deltooides*;
- (3) qRT-PCR primers P5 for *NptII* gene, P fo6r *PdOLP1*, P7 and P8 for *TUA1* and *UBQ1*;
- (4) Primer pair used for amplifying the coding region of PtoWRKY40 (P9), PtoARF1 (P10), PtobZIP5 (P11), PtoBEL8 (P12), and PtobHLH7 (P13) of *P. tomentosa*;
- (5) Primer of P14 for amplifying the *PdOLP1* and inserted into pGreenII 62-SK vector.

Table S4. Primers used for analysis of wood formation genes.

| <b>Gene name</b>   | Description                          | NCBI or JCI accession number | Primer sequence (forward/reverse)                         | Amplification efficiency (%) | R <sup>2</sup> |
|--------------------|--------------------------------------|------------------------------|-----------------------------------------------------------|------------------------------|----------------|
| <i>PtrCAD10</i>    | Cinnamyl alcohol dehydrogenase       | XM_002300175.1               | CAGCACTTTGTACTCCGTAT<br>TCC/TGCTTCCCTGGTTCTGT<br>CATT     | 95.89                        | 0.9967         |
| <i>Ptr4CL3</i>     | 4-coumaryl:CoA ligase                | XM_002297663.2               | ACTAGCCCATCCAGAGATA<br>TCCGA/TCATCTTCGGTGGC<br>CTGAGACTTT | 92.16                        | 0.9995         |
| <i>PtrC4H1</i>     | 4-coumarate:cinna mate-4-hydroxylase | AF302495.1                   | CCCTCTTGGGTTCTTTTCGTT/<br>CAAACACGGGGACAGGTAT<br>A        | 99.07                        | 0.9933         |
| <i>PtrMYB90</i>    | Myeloblastoma 90                     | XM_002329715                 | CCGAAGAGGAAGAAGAAA<br>GACT/TCAGTGCGACCTGGG<br>AAAA        | 95.85                        | 0.9972         |
| <i>PtrCCoAOMT1</i> | Caffeoyl CoA 3-O-methyltransferase   | XM_002313089                 | TTGGTGGGCTGATTGGGTA/<br>GCTCCAAAACAAAGTCCCT<br>GT         | 100.005                      | 0.9961         |
| <i>PtrTUB7</i>     | beta-tubulin 7                       | XM_002299006.1               | TTGAGCCATACAACGCCAC /<br>CGGAAGCAGATGTCATACA<br>AA        | 98.61                        | 0.9972         |
| <i>PtrFRA1</i>     | Fragile fiber 1                      | XM_002302396.1               | CAGCAGAACTGTTATGATA<br>GC /<br>TGTTGCGGGCACGATTTG         | 94.13                        | 0.9973         |
| <i>PtrSuS1</i>     | Sucrose synthase 1                   | GU559729.1                   | TTCCCTCGCCCAACTCTT/<br>GATGCAGGCTTTCCTTGTC                | 94.55                        | 0.9994         |
| <i>TUA1</i>        | $\alpha$ -tubulin 1                  | CA822230;CA825391            | AGGTTCTGGTTTGGGGTCTT<br>/TTGTCCAAAAGCACAGCAA<br>C         | 97.7                         | 0.9985         |
| <i>UBQ1</i>        | Ubiquitin 1                          | BU879229                     | GTTGATTTTTGCTGGGAAGC<br>/GATCTTGGCCTTCACGTTG<br>T         | 95.92                        | 0.9977         |

Table S5 Primers used in qRT-PCR analysis of *PdOLP1* coexpressed genes

| Gene name  | Gene ID          | Forward primers (5'→3')    | Reverse primers (5'→3')   |
|------------|------------------|----------------------------|---------------------------|
| PtrXYL5    | Potri.018G009300 | CCGAGAAGTTAGGCAA<br>AG     | AACCCAAACAAAGCA<br>CC     |
| PtrBHLH110 | Potri.005G230800 | AATAACAGAGGCTAAA<br>AGG    | AAAAGGAGGGCAGG<br>GAGA    |
| PtrBHLH71  | Potri.005G071100 | GCATCAATCATAGGTG<br>GGGC   | TCCGAGAAGAGAGAA<br>GAGCA  |
| PtrSER     | Potri.014G026100 | CAACTCGTGTAATGGG<br>AAC    | AGGGCGGCTGTAATC<br>AAC    |
| PtrZF      | Potri.008G055100 | GGTTCAACTACCTGAAA<br>CAGC  | CTTCTACAGCCACCG<br>CCAACA |
| PtrGLY48   | Potri.005G058300 | TGCTTTTCTCTTGTTG<br>GCC    | GTGCCAAAAGGTTTCG<br>TGTCT |
| PtrPK      | Potri.001G117800 | GCCATTGTTGCAGGGGT<br>TAT   | TGCTTAGCCGACCAT<br>CAGAA  |
| PtrLRR5    | Potri.003G179100 | AATGGAGTGGTGCAAA<br>GCTG   | GGGATGGCCTTGAA<br>AACACC  |
| PtrPOD     | Potri.003G214700 | TGTTCGTTTGGCAGGAG<br>G     | AAGGGCAACCAGGTC<br>ACTA   |
| PtrPCD2    | Potri.011G001800 | ACCCTCGTGATTCCCCT<br>TTT   | GATAATGGCAGCGAC<br>CGAAG  |
| PtrGRAS    | Potri.003G202100 | TTCACCGAAGATGAGC<br>AGCT   | AGCTTTTGTGACCCTC<br>TCCA  |
| PtrGLU     | Potri.006G116900 | GCGCACCATTCCCTTTC<br>TAG   | GCCCACTTCCTGTTCA<br>ACTG  |
| PtrPP2     | Potri.012G120400 | TCACTGTGGATGTGGCA<br>GA    | TTGGGAGAACCAGT<br>GAG     |
| PtrNAC75   | Potri.018G068700 | AGGTCTGCATCTGGTT<br>TGGA   | TCAACCACTCTGCCT<br>CTTGT  |
| PtrBEL1    | Potri.010G197300 | CTGCTGGTGTTAGTGGA<br>AGC   | TTGACGTGGTGAGGT<br>ATGCT  |
| PtrBZIP42  | Potri.017G106700 | CACAGGTGGTTTGGTT<br>CCG    | CAGGTGATGTCTTCC<br>AGGTC  |
| PtrMYB     | Potri.002G168900 | TGATTTGGTAGAGGTAA<br>GCAGC | CCTGTCTCCGACCAG<br>CTTAT  |
| PtrMYB308  | Potri.018G005300 | AGCGTGGACACCTCTTG<br>AAG   | ATTCATCCAACGAAG<br>CCTGC  |
| PtrDyn     | Potri.003G024900 | GCTCAACCAATACTCA<br>GGCG   | CGGGGAAGGAAATT<br>TGGCAA  |



Table S6. OLP sequences of *P. deltoides* and the homologous genes from 51 other plants.

>PdOLP1           MK052942                   Populus deltoides  
MTTARPIFACAFVILCTLFHAARPELILTLVNNCPFTIYPAILPNAGHPVLEKGGFPL  
QTLTHRSFRAPDQHWGRIWGRTGCTYSNGKFQCATGDCNNRIECNGLGGAPPAA  
LAQITLHHGHNDFSSYGVSLVDGFNLPMTVTPHEGKGVCPVVGCRANLLSTCPDE  
LKFRSPAGHVVGCKSGCEAFGTDELCCRNHYNSPQTCRASSFSEFFKHACPATFTY  
AHDSPSLMHECSPRELKVIFCH

>PdOLP2           Podel.01G248000.1           Populus deltoides  
MATATQLFTCALLISCTLFHVARPELIITLVNNCHFTIYPAIQPNAGHPVLEKGGFPL  
QTLTHRSFRAPDQLWSGRIWGRTGCAHSNGKFHCVTGDCNNRIECNGLGGATPAT  
LAQITIIHHGHKDFSSYGVSLVDGFNLPMTVTPHEGKGVCPVVGCRANLLATCPEKL  
QFRSLGRHGHVAGCKSGCEALGTDELCCRNHYNSPQTCRASTFSEFFKHACPATFT  
YAHDSPLTHECSPRELKVIFCH

>PagOLP1       Pop\_G09G014129.T1       Populus alba × Populus glandulosa  
MATAKPIFACAFVILCTLFHAARPELILTLVNNCPFTIYPAIQPNAGHPVLEKGGFPL  
QTLTHRSFRAPDQQWSGRIWGRTGCTHSNGKFQCATGDCNNKIECNGLGGAPPAT  
LAQITLHHGHNDFSSYGVSLVDGFNLPMTVTPHEGKGVCPVVGCRANLLSTCPDE  
LKFRSPAGHVVGCKSGCEAFRTDELCCRNHYNSPQTCRASSFSEFFKHACPATFTY  
AHDSPSLMHECSPRELKVIFCH

>PagOLP2       Pop\_A01G056866.T1       Populus alba × Populus glandulosa  
MATATQLIACALLISCTLFHVARPELIITLVNNCPFTIYPAIQPNAGHPVLEKGGFPL  
QTLTHRSFRAPDQLWSGRIWGRTGCAHSNGKFHCVTGDCNNRIECNGLGGATPAT  
LAQITIIHHGHKDFSSYGVSLVDGFNLPMTVTPHEGKGVCPVVGCRANLLATCPEKL  
QFRSLGRHGHVVGCKSGCEALGTDELCCRNHYNSPQTCRASTFSEFFKHACPATFT  
YAHDSPLMHECSPRELKVIFCH

>PagOLP3       Pop\_A09G059600.T1       Populus alba × Populus glandulosa  
MATAKPIFACAFVILCTLFHAARPELILTLVNNCPFTIYPAIQPNAGHPVLEKGGFPL  
QTLTHRSFRAPDQLWSGRIWGRTGCTHYNGKFQCTTGDCNNKIECNGLGGAPPAT  
LAQITLHHGHNDFSSYGVSLVDGFNLPMTVTPHEGKGVCPVVGCRANLLSTCPDE  
LKFRSPAGHVVGCKSGCEAFRTDELCCRNHYNSPQTCRASSFSEFFKHACPATFTY  
AHDSPSLMHECSPRELKVIFCH

>PagOLP4       Pop\_G01G020795.T1       Populus alba × Populus glandulosa  
MATATQLFTCALLISCTLFHVARPELIITLVNNCPFTIYPAIQPNAGHPVLEKGGFPL  
QTLTHRSFRAPDQLWSGRIWGRTGCAHSNGKFHCVTGDCNNRIECNGLGGATPAT  
LAQITIIHHGHKDFSSYGVSLVDGFNLPMTVTPHEGKGVCPVVGCRANLLATCPEKL  
QFRSLGRHGHVVGCKSGCEALGTDELCCRNHYNSPQTCRASTFSEFFKHACPATFT  
YAHDSPLIHECSPRELKVIFCH

>PtrOLP        XP\_024463852.1        Populus trichocarpa  
MTTARPIFACAFVILCTLFHAARPELILTLVNNCPFTIYPAIQPNAGHPVLEKGGFPL  
QTLTHRSFRAPDQHWSGRIWGRGTGCHSNGKFQCTTGDCNNRIECNGLGGAPPAT  
LAQITLHHGHNDFSSYGVSLVDGFNLPMTVTPHEGKGVCPVVGCRANLLSTCPDE  
LKFRSSAGHVVGCKSGCEAFGTDELCCRNHYNSPQTCRASSFSEFFKHACPATFTY  
AHDSPSLTHECSSPRELKVIFCH

>PeuOLP       XP\_011042680.1        Populus euphratica  
MTTARPIFAYAFVILCTLFQAARPELILTFVNNCPFTIYPAIQPNAGHPVLEKGGFPL  
QTLTHRSFRAPDQHWSGRIWGRGTGCHSNGKFQCTTGDCNNRIECNGLGGAPPAT  
LAQITLHHGHNDFSSYGVSLVDGFNLPMTVTPHEGKGVCPVVGCRANLLSTCPDE  
LKFRSPAGHVVGCKSGCEAFGTDELCCRNHYNSPQTCRASSFSEFFKHACPATFTY  
AHDSPSLMHECSSPRELKVIFCH

>PtoOLP       APA20308.1        Populus tomentosa  
MATATQLIACALLISCTLFHVARPELIITLVNNCPFTIYPAIQPNAGHPVLEKGGFPL  
QTLTHRSFRAPDQLWSGRIWGRGTGCAHSNGKFHCVTGDCNNRIECNGLGGATPAT  
LAQITIHHGHKDFSSYGVSLVDGFNLPMTVTPHEGKGVCPVVGCRANLLATCPEKL  
QFRSLGGHGHVVGCKSGCEALGTDELCCRNHYNSPQTCRASTFSEFFKHACPATFT  
YAHDSPSLMHECSSPRELKVIFCH

>MeOLP        XP\_021626825.1        Manihot esculenta  
MAAPKPPMFFSTITVTLILFQATPHGVQGLLTLVNNCPFTVYPAIQPNSGHPVLEK  
GGFPLPTLTHRSFPAPNQHWSGRIWARTDCTHANGKFYCATGDCNHQLECNGLGG  
ASPATLAQFSLHHGHKDFSSYGVSLVDGFNVPMTITPHEGTGVCVVGCRANLLAT  
CPEKLQLRYPAGHGRVVACKSGCEAFGTDELCCRNHYNSPQTCRASSFSEFFKHAC  
PATFTYAHDSPSLMHECSSPRELKVIFCH

>HbOLP        XP\_021636655.1        Hevea brasiliensis  
MAATLFFFSITTILILSQATPPGVQGLFLTLVNNCPFTVYPAIQPNSGHPVLEKGGFPL  
PTLTHRSFPAPNQPSGRIWARTGCTHTNGKFHCATGDCNHQLECNGLGGASPAT  
LAQFSLHHGHKDFSSYGVSLVDGFNVPMTVTPHEGQGVCPVVGCRANLLATCPEK  
LQLRYPAGHGPVVACKSGCEAFGTDELCCRNHYNSPQTCRASSFSEFFKHACPATF  
TYAHDNPSLMHECSSPRELKVIFCH

>RcOLP        XP\_002531364.1        Ricinus communis

MAYSSAAITALLFYSTITTLTSFSQATPPGLILTLVNNCPTYTIYPAIQPNNSGSPVLEKG  
GFPLTTLTHRSFPVFNHHWSGRIWARTGCTHYNGKFHCATGDCNHQIECNGLGGA  
TPATLAQFSLHHGHNDFFSSYGVSLVDGFNIPMTVTPHEGKGVCVVGCRANLLAT  
CPAKLQLRYPAGHGPVVACKSGCEAFGTDEFCCRNHYNSPQTCRASSYSQFFKHA  
CPATFTYAHDSPSLMHECSPRELKVIFCH

>DzOLP XP\_022756598.1 Durio zibethinus  
MASPLYFSLFFLATLFLLCSEFAKASEPDLILTLVNNCPTIYPAIQPNAGHPVLQRGG  
FALQTLTHRSFPAPT VHWSGRIWARTGCTHSNGQFYCATGDCGHRIECNGLGGAT  
PVTLAQFSLHHRGHKDLSSYEVSLVDGFNIPMTVTPHDGKGLCPVVGCRANLLAT  
CPNQLQLRSPPGHGPVVGCKSGCQAFGTDELCCRNHYNSPQTCRASSYSEFFKHAC  
PATFTYAHDSPSLMHDCASPRELKVIFCH

>CjOLP BAI63297.1 Citrus jambhiri  
MASTSPIFISATILLSSYAKASFILTLVNNCPPVWPAIQPNAGHPVLERGGFYLHS  
LTHRSFPAPAQHWSGRIWARTGCTYAHGKFSCVTGDCGHRLESNGLGGATPATLA  
QFSLHHGHNDLSSYGVSLVDGFNVPMTVTPHEGKGVCVVGCRADLLATCPQNL  
QVRSPPGHGRVVACKSGCEAFGTDELCCRNHYNSPQTCRASSFSEFFKHACPATMT  
YAHDSPSLMHDCSSPRELKVIFCH

>VfOLP ARV78462.1 Vernicia fordii  
MKMATLFFSAISATFLILCTFCQATPPGLILTLVNNCPTVYPAIQPNNSGFPVLEKGG  
FPLSTLTHRSFAVFNQHWSGRIWGRTGCTHTNGKFHCATGDCNHQIECNGLGGAT  
PVTLAQFSLHHGHNDFFSSYGVSLVDGFNLPMTVTPHEGKGVCVVGCRANILNTC  
PAKLQVRYPVGHGQVVACRSVCEAFGTDELCCRNHYNSPQTCRASSFSEFFKHAC  
PATYTYAHDSPSLMHECSPRELKVIFCH

>TcOLP XP\_007016468.1 Theobroma cacao  
MASPLCASLFCFATLFLLCSEFAAATQPGLILTLVNNCPTVYPAIQPNAGHPVLERG  
GFALQTLTHRSFPAPTAHWSGRIWARTGCTHSNGHFYCATGDCGHRIECNGLGGA  
TPVTLAQFSLHHGGHGHKDLSSYAVSLVDGFNVPMTVTPHEGKGLCPVVGCRANLLA  
TCPDKLQLRSPPGHGPVVGCKSGCEAFGTDELCCRNHYNSPQTCRASSFSEFFKHA  
CPATFTYAHDSPSLTHECASPRELKIIFCH

>CsiOLP XP\_006488293.1 Citrus sinensis

MASTSPIFISATILLSSYAKASFILTLVNNCPFPVWPVPAIQPNAGHPVLERGGFYLHS  
LTHRSFPAPAQHWSGRIWARTGCTYAHGKFSCVTGDCGHRLECENGLGGATPATLA  
QFSLHHGHNDLSSYGVSLVDGFNVPMTVTPHEGKGVCVVGCRADLLATCPQNL  
QVRSPPGHGRVVACKSGCEAFGTDELCCRNHYNSPQTCRASSFSEFFKHACPATMT  
YAHDSPSLMHDCSSPRELKVIFCH

>CcOLP XP\_006424795.1 Citrus clementina  
MASTSPIFISATILLSSYAKASFILTLVNNCPFPVWPVPAIQPNAGHPVLERGGFYLHS  
LTHRSFPAPAQHWSGRIWARTGCTYAHGKFSCVTGDCGHRLECENGLGGATPATLA  
QFSLHHGHNDLSSYGVSLVDGFNVPMTVTPHEGKGVCVVGCRADLLATCPQNL  
QVRSPPGHGRVVACKSGCEAFGTDELCCRNHYNSPQTCRASSFSEFFKHACPATMT  
YAHDSPSLMHDCSSPRELKVIFCH

>VvOLP XP\_002281193.1 Vitis vinifera  
MASSSTISSSFVFFAVFLFLCTLSHATNPGLILTVVNNCPFTIWPVPAIQPNAGHDVLER  
GGFALHTLTHRSFAAPSHHWSGRIWARTGCTYINGKFSCVTGDCGGRLECSGSGG  
AAPATLAQFTLHHGQNDFFSSYAVSLVDGFNLPMTVTPHEGKGLCPVVGCRANLLE  
TCPGKLQMWSPPHEGKVVACKSGCEAFGTDELCCRNHYNSPQTCRASSFSEFFKH  
ACPATFTYAHDSPSLMHECSPRELKVIFCH

>HuOLP XP\_021278215.1 Herrania umbratica  
MASTLCASLFCFVTLFLLCSFAGATQPGLILTLVNNCPFTVYPAIQPNAGHPVLERG  
GFALQTLTHRSFPAPTAHWSGRIWARTGCTHSNGHFYCATGDCGHRIECSGLGGA  
PPVTLAQFSLHHGGHKDLSSYAVSLVDGFNVPMTVTPHEGKGLCPVVGCKANLLA  
TCPDKLQLRSPPGHGPVVGCKSGCQAFGTDELCCRNHYNSPQTCRASSFSEFFKHA  
CPATFTYAHDSPSLTHECASPRELKIIFCH

>JrOLP XP\_018823302.1 Juglans regia  
MLFSRVKKMASLSLRFTLFSTAAFLILCIFTEATPHHPEFILTLVNNCPFTVWPVPAIQ  
NSGHAVLERGGFALNTLTHHSFPAPAQHWSGRIWARTGCSYNHGHFSCATGDCG  
GRLECENGLGGSSPATLAQFSLHHGHNDLSSYAVSLVDGFNVPMTVTPHEGKGLCP  
VVGCRASLLATCPDRLQVRSPPGHGPVVACKSGCEAFGTDELCCRNHYNSPQTCR  
ASSFSEFFKHACPATFTYAHDSPSLMHECSPRELKIIFCH

>QsOLP XP\_023907784.1 Quercus suber  
MASSSFVFLTATFLILCTLTRATNPGLFLTLVNNCPFTVWPVPAIQPNAGHPVLERGGF  
ALHTLTHHSFPAPTQHWSGRIWARTGCTYANNRFSCATGDCGNRLECDGLGGATP  
ATLAQFSLHHGHTDLSSYAVSLVDGFNVPMTVTPHEGKGQCPVVGCRANLLATCP  
DKLQLRSPPGHGPVVACKSGCEAFGTDELCCRNHYNSPQTCRASTFSEFFKHACPA  
TFTYAHDSPSLMHECSPRELKVIFCH

>GhOLP XP\_016689054.1 Gossypium hirsutum  
MASSLLVLATIFVLCSFGKASHPGLILTVNNCPFTIYPAIQPNAGHPVLERGGFALH  
TLTHRSFPAPTVHWSGRIWARTGCTYSNGHFSCATGDCGHRIECNGLGGATPVTIA  
QFSLHHGGHDKDLSSYEVSVDGFNIPMTVTPHEGKGLCPVVGCRANILATCPGKLQ  
YRSPPHGPVVGCKSGCAAFTDELCCRNHYNSPQTCRASSYSEFFKHACPATFTYA  
HDSPSLMHDCSPRELKVIFCH

>GrOLP XP\_012446484.1 Gossypium raimondii  
MASSLLVLATIFVLCSFGKATHPGLILTVNNCPFTIYPAIQPNAGHPVLERGGFAL  
HTLTHRSFPAPTVHWSGRIWARTGCTYSNGHFSCATGDCGHRIECNGLGGATPVTI  
AQFSLHHGGHDKDLSSYEVSVDGFNIPMTVTPHEGKGLCPVVGCRANILATCPGKL  
QYRSPPHGPVVGCKSGCAAFTDELCCRNHYNSPQTCRASSYSEFFKHACPATFTYA  
AHDSPSLMHDCSPRELKVIFCH

>GaOLP XP\_017650093.1 Gossypium arboreum  
MASSLLVLATIFVLCSFGKATHPGLILTVNNCPFTIYPAIQPNAGHPVLERGGFAL  
HTLTHRSFPAPTVHWSGRIWARTGCTYSNGHFSCATGDCGHRIECNGLGGATPITI  
AQFSLHHGGHDKDLSSYEVSVDGFNIPMTVTPHEGKGLCPVVGCRANILATCPGKL  
QYRSPPHGPVVGCKSGCAAFTDELCCRNHYNSPQTCRASSYSEFFKHACPATFTYA  
AHDSPSLMHDCSPRELKVIFCH

>JcOLP XP\_012065012.1 Jatropha curcas  
MATATVLFSTISTALFILFSFGQAAPLILTLVNNCPFTVYPAIQPNAGHPVLEKGGFP  
LSTLTHRSFPVFNQHWGRIWARTGCTHTNGKFHCATGDCNHQLECNGLGGAPPA  
TLAQFSLHHGHNDFFSSYGVSLVDGFNLPMTITPHEGKGVCVVGCRANLLTTCPOK  
LQVRYVPVGHGPVVACKSGCLAFGTDELCCRNHYNNPQTCRASSYSEFFKHACPAT  
FTYAHDSPSLMHECSPRELKVIFCH

>EsOLP XP\_006409911.1 Eutrema salsugineum

MAKTSPLAASFLLLLISSAAAADTGRFLFTVVNHCPFTVWPVWPAIQPNAGHPVLEKGG  
GFALPTNTHRSFSAPATHWSGRIWGRGTGCSHYNGKFSCVTGDCGHRLECENGLGGA  
TPASLAQFDLHHGAHLDLSSYGVSLVDGFNVPMTVTPHEGRGVCPVVGCREDLK  
TCPAHLQLRSGHGGHVVACKSGCEAFRTDELCCRNHYNSPQTCRASSHSLFFKHA  
CPSTMTFAHDSPLMHDCSSPRELKVIFCH

>RsOLP XP\_018463081.1 Raphanus sativus  
MASRASLPLAASFLLLLISSFAADTGRFLFTVVNHCPFTVWPVWPAIQPNAGHPVLEKGG  
GFALPTNTHRSFSAPTSHWSGRIWGRGTGCSHYNGKFSCVTGDCGNRLECENGLGGA  
TPASLAQFDLHHGGHQDLSSYGVSLVDGFNVPMTVTPHEGRGVCPVVGCREDLK  
TCPAHLQLRSGHGGHVVACKSGCEAFRTDELCCRNHYNSPQTCRASSHSLFFKHA  
CPSTMTFAHDSPLMHDCSSPRELKVIFCH

>BnOLP XP\_013676421.1 Brassica napus  
MAKTSPLAASFLLLLISSATSADTGRFLFTVVNHCPFTVWPVWPAIQPNAGHPVLEKGG  
FALPTNTHRSFLPPSTHWSGRIWGRGTGCSHYNGKFSCVTGDCGHRLECENGLGGATP  
ASLAQFDLHHGGHQDLSSYGVSLVDGFNVPMTVTPHEGRGVCPVVGCREDLK  
CPAHLQLRSHGGHVVACKSGCEAFRTDELCCRNHYNSPQTCRASSHSLFFKHACPS  
TMTFAHDSPLMHDCSSPRELKVIFCH

>BrOLP XP\_009140942.1 Brassica rapa  
MAKTSPLAASFLLLLISSTTADTGRFLFTVVNHCPFTVWPVWPAIQPNAGHPVLEKGG  
FALLTNTHRSFFPPSTHWSGRIWGRGTGCSHYNGKFSCVTGDCGHRLECENGLGGATP  
ASLAQFDLHHGGHQDLSSYGVSLVDGFNVPMTVTPHEGRGVCPVVGCREDLK  
CPAHLQLRSHGGHVVACKSGCEAFRTDELCCRNHYNSPQTCRASSHSLFFKHACPS  
TMTFAHDSLMLMHDCSSPRELKVIFCH

>BooOLP XP\_013632142.1 Brassica oleracea var. oleracea  
MVKTSPLPTGFFFLISSFAADTGRFLFTVVNHCPFTVWPVWPAIQPNAGHPVLEKGG  
FALPTNTHRSFSPPTTHWSGRIWGRGTGCSHYNGKFSCVTGDCGNRLECENGLGGATP  
ASLAQFDLHHGGHRDLSSYGVSLVDGFNVPMTVTPHEGRGVCPVVGCREDLRTC  
PAHLQLRSGHGGHVVACKSGCEAFRTDELCCRNHYNSPQTCRASSHSLFFKHACPS  
TMTFAHDSPLMHDCSSPRELKVIFCH

>BoOLP AAO12209.1 Brassica oleracea

MAKTSPLAASFLLLLISSAAAADAGRLFLTVVNHCPFTVWPVPAIQPNAGHPVLEKGGFALPTNTHRSFFPPSTHWSGRIWGRGTGCSHYNGKFSCVTGDCGHRLECNGLGGA TPASLAQFDLHHGGHQDLSSYGVS LVDGFNVPMTVTPHEGRGVCPVVGCREDLLK TCPAHLQLRSHGGHVVACKSGCEAFRTDELCCRNHYNSPQTCRASSHSLFFKHACP STMTFAHDSPSLMHDCSSPRELKVIFCH

>RcOLP [XP\\_024159050.1](#) Rosa chinensis  
MAHSHSLSLSLLSATLLILCSLAHATYPGHILTVVNNCPFIWPAIQPNNSGSPVLEKGGFALPSLTHRSFPAPTQWWSGRIWARTGCSHSHNHFSCLTGDCGGKLECNAGGA TPATLAQFVLHHGPNDLWSYGVS LVDGFNIPMTVTPHEGKGVCPVVGCKANLLAT CPDRLQVRSPAGHGPVVACKSACEAFGTDELCCRNKYNSPHTCRASSFSQYFKQA CPATFTYAHDSPMLMHQCSSQRELKVIFCH

>OeOLP [XP\\_022881590.1](#) Olea europaea  
MAFPSTIFSLLLLVLCTLPKATHAGLILTLVNNCPYTIWPAIQPNAGHPVLERGGFA LHTLTHRSFPAPTTHWSGRVWARTGCTYAKGHFSCATGDCGGRLECEGLGGAAP ATLAQFTLHHGHADFSSYGVS LVDGFNIPMTVTPHEGKGVCPVVGCRVDLLATCP HGLKYYAPDGHVMGCKSGCTAFGTDELCCRNHYNSPQTCHASSYSAFFKHACPA TVTYAHDNPSLMHECSPRELKVIFCH

>FaOLP [ABB86299.1](#) Ficus awkeotsang  
MILTLVNNCPYPVWPVPAIQPNAGHPVLERGGFFLYSLTHRSFPAPTQHWSGRIWGRGT GCISAYNRFSCATGDCGGQLECNAGGKTPATLVQLSLHHGHNDLSSYGVS LVDGFNLGLTVTPHEGKGVCPVVGCRPDLLATCPDRLQVRSPHGHVVACKSGCDAFGTD ELCCRNRYNSPQTCRASSYSAFFKHACPSSTYAHDTPSLMHDCSSPRELKVIFCH

>CsOLP [XP\\_010470049.1](#) Camelina sativa  
MAKTSPLAASFLLLISFSSAADSGRLFLTVVNNCPFTVWPVPAIQPNAGHPVLEKGGF ALPTFTHRSFSAPTTHWSGRIWARTGCAHYNGKFSCVTGDCGNRLECNGLGGATP ASLAQFDLHHGGHKDFSSYGVS LVDGFNVPMTVTPHEGHGVCPVVGCREDLLKT CPGHLQVRSHAGHVVACKSGCEAFHSDELCCQGHYNSPNTCKASSHSLFFKHACP STFTFAHDSPSLMHDCSSPRELKVIFCH

>ErgOLP [XP\\_012827362.1](#) Erythranthe guttatus  
MAATYLFPLSIFVICTVAKATHPGLILTVVNNCPYTIWPAIQPNAGHPALERGGFA LSSLTHRSFPAPSAHWSGRLWARTGCIYAHGRFSCATGDCGGRLECGGLGGAAPA

TLAQFTLHHGHADFSSYSVSLVDGFNIPMTVTPHEGKGQCPVVGCRADLLATCPH  
ALQVRGPPHGGVIGCKSGCAAFTDELCCRNHYNSPQTCRASSYSEFFKHACPATF  
TYAHDSPSLTHECSAPRELKVIFCH

>FvOLP XP\_004294572.1 Fragaria vesca  
MARSHSILLLSATLLILCSLAHATSPGHILTVVNNCPFPIWPAIQPNTGGQILERGGFF  
LPSLSHRSPAPTQSWSGRIWARTHCSRSNNRFSCLTGDCGGKLECNAGGATPAT  
LAQFVLHHGPNDLWSYGVSLVDGFNVPMTPHEGKGVCPVVGCKADLLATCPG  
QLQVRSHPGVVACKSACEAFGSDELCCRNKYNSPQTCRASSFSQFFKHACPATFTY  
AHDSPMLMHQCSSPRELKVIFCH

>InOLP XP\_019199014.1 Ipomoea nil  
MAAPISLFSLSLLLTLCLVCKATAPGLILTVVNNCPYTVWPAIQPNAGHPVLERGGF  
ALNTLTHRSFAAPNAHWSGRIWARTGCTYAHGHFSCASGDCGGRLECDGAGGAT  
PATLAQFVLHHGHADFSSYGVSLVDGFNLPMTVTPHEGKGKCPVVGCRANLLDTC  
PAGLQFRSHGGHGPVVGCKSGCEAFKTDELCCRNHYNNPQTCKGSTYSEFFKHAC  
PATFTYAHDSPSLMHECSAPRELKVIFCH

>NtOLP XM\_018769102.1 Nicotiana tomentosiformis  
MASSSTKTLLSLSLFLTLALSQATYSGLILTVVNNCPYTIWPAIQPNAGHPVLERG  
GFALHTLTHRSFAAPTTHWSGRIWARTGCSYAHGKFNCATGDCGGRIECDGLGGA  
TPATLAQFVLHHGHADFSSYGVSLVDGFNIPLTVTPHEGKGQCPVVGCRAEILQTC  
PAVLQLRSHGGHGPVVGCKSGCEAFKTDELCCRNHFNSPQTCKGSSYSEFFKHACP  
ATFTYAHDSPSLMHECSPRELKVIFCH

>NnOLP XP\_010259948.1 Nelumbo nucifera  
MTLLSSASASRSSFLLFALSLLLLLRCRSTLTHATSPGFILTVVNNCPFTIWP  
AGHVVLERGGFALQTLTHRSFPAPAHHWSGRLWARTGCTYSNGRFSCATGDCGGR  
LECNAGGVTPATLAQFSLHHGHNDQSSYGVSLVDGFNLPMTVTPHEGKGVCPVV  
GCKANLLETCPKSLQLRCPGHPVVGCKSGCEAFGTDELCCRNHYNSPQTCKASS  
YAEFFKHACPATVTYAHDSPSLMHQCSSPRELKVIFCH

>ElgOLP XP\_010918389.1 Elaeis guineensis  
MASSSSCSSFPLISLTFYSLLFLIVVQQVAAQYPAMTLTVVNNCPFTVWPAVQPNSG  
HDVLEKGGFALSTLTHRSFPAPTHHWSGRIWGRTGCTFSGGRFSCATGDCGGRLEC  
GGLGGAAPATLAQITLHHGRRDLSSYGVSLVDGFNVGMTVTPHEGKGQCPVVG



RANLLATCPDVLQVRAPVGGHVGCKSGCQAFGTDELCCRNKYNNPRTCRASTYS  
EFFKHACPATFTYAHDSPSLTHDCESPKEKLVIFCH

>EgOLP XP\_010033142.1 *Eucalyptus grandis*

MARAAASLLFPTAVLLLLLLAPSPSQALTLTLVNNCPFTVWPVPAIQPNAGHPVLERGG  
FPLTLTHRSFPHRRPWSGRVWARTACSHGHGGHFCATGDCGGRLECEGLGGATPA  
TLAQFSLHHGHADFSSYAVSLVDGFNVPMTVTPHEGKGVCPVVGCRANLLATCPPH  
LQMRSPAGHGPVVACKSGCEAFRTDELCCRNHFNSKDTCRPSSYSEFFKHACPATFT  
YAHDSPSLMHECSPRELKLVIFCH

>NtOLP NP\_001312698.1 *Nicotiana tabacum*

MASSSTKTLTSLSLFLTLALSQATYSGLLTLVNNCPYTIWPAIQPNAGHPVLERGG  
FALHTLTHRSFAAPTTHWSGRIWARTGCSYAHGKFNCATGDCGGRIECDGLGGATP  
ATLAQFVLHHGHADFSSYGVSLVDGFNIPLTVTPHEGKGQCPVVGCRAEILQTCPAV  
LQLRSHGGHGPVVGCKSGCEAFKTDELCCRNHFNSPQTCKGSSYSEFFKHACPATF  
TYAHDSPSLMHECSPHELKVILCH

>PaOLP XP\_021820385.1 *Prunus avium*

MASSYHNNSLALLTTFLILCSLTHATSPAPFLTLVNNCPFLWPVGIQPNAGHPVLER  
GGFYLPALSHRSFPTPTQPWSGRIWARTHCTHTQNHFSCLTGDCGGRLECNGAGGA  
APATLAQVSLHHGPNDLFSYGVSLVDGFNVPITPHEGHGVCVVGCKADLLATC  
PERLRVTSHAGVVACKSACEAFRSDELCCRNHYNSPQTCRASSYSEFFKRACPATFT  
FAHDSPTLMHQCSSPHELKLVIFCH

>AtOLP NP\_001324474.1 *Arabidopsis thaliana*

MHIEKYFSLYTHWHTFHTKSYTMAKTSPLAASFLLISFSSAVDTSRLFLTVV  
NNCPFTVWPVPAIQPNAGHPVLEKGGFALPTFTHRSFNVPTTHWSGRIWARTWCAHY  
NGKFSCLTGDCGNRLECNGLGGAPPASLAQFDLHHGGHDFSSYGVSLVDGYNVP  
MTVTPHEGHGVCVVGCREDLIKTCPAHLQVRSVSHGHVVACKSGCEAFHTDELCC  
RGHYNSPNTCKASSHSLFFKHACPSSFTFAHDSPSLMHDCASPRELKVIFCH

>AlOLP XP\_020885214.1 *Arabidopsis lyrata*

MHIKIYFSLYIYTHVALSHLHQKLHTMAKTSPLAASFLLISFSSAVDTSHLFLTVV  
NNCPFTVWPVPAIQPNAGHPVLEKGGFALPKYTHRSFNAPTTHWSGRIWARTGCAHY

NGKFSCITGDCGNRLECNGLGAPPASLAQFDLHHGGHHDFSSYGVSLVDGYNVP  
MTVTPHEGHGVCPPVVGCREDLIKTCPAHLQVRSHSGHVVACKSGCEAFHTDELCC  
RGHYNSPNTCKASSHSLFFKHACPSSFTFAHDSPSLMHDCSSPRELKVIFCH

>DcarOLP XP\_017251860.1 Daucus carota

MAFFYHSLILFISLSTLSAATQQPFLITVNNCPFTIWPAIQPNYGHVPVLENGGFCLP  
ALSHRSFPAPTSPWSGRIWARTHCTSPSHHFSCATGDCGTGKLECMGHGGSPATL  
AQFSLHHGPTDLSSYAVSLVDGFNVPMTVTPHEGHGVCPPVVGCKGDLLATCPRAL  
QVRASGGHVVGCKSACEAFGKDEFCCRGHFNSPQTCKPSSYSEFFKSACPSTFTYA  
HDTPSLTHECSAPRELKVIFCH

>NsOLP XP\_009800616.1 Nicotiana sylvestris

MASSSTKTLSSLCLTLCALSQATYSGLILTLVNNCPYTIWPAIQPNAGHPVLERGG  
FALHTLTHRSFAAPTTHWSGRIWARTGCSYAHGKFSCATGDCGGRIECEGLGGATPA  
TLAQFALHHGHADFSSYGVSLVDGFNIPLTVTPHEGKGQCPVVGCRAEILQTCPAVL  
QLRSHGGHGPVVGCKSGCEAFKTDELCCRNHFNSPQTCKGSSYSEFFKHACPATFT  
YAHDSPSLMHECSPRELKIIFCH

>CpOLP XP\_021887635.1 Carica papaya

MASSASSSSSSLLLASTFLILFTLVKSTYPGLNITLVNNCPYTVWPAIQPNAGDPVLE  
KGGFALHSLTHHSFAAPSQHWGRFWGRTGCRYANGLFSCVTGDCGHRLECNGLG  
GATPATLVEFSLHHGHNDFFSYRVSVDGFNLPLTVTPHEGKGLCPVVGCRANLLE  
TCPEKLQLRYGHGPVVACKSGCEAFKTDELCCRNHYNSPQTCRASSFSEFFKHACP  
STFTYAHDSSLLHECSPRELKIIFCH

>GmOLP XP\_003538000.1 Glycine max

MARSLFLCSLLIFAVTTFSSPTGALILTLVNNCNVTVWPAIQPNAGHPVLAGGGLTLR  
TLTHQSIPVPDAHWSGRVWARTGCAYSGTAFSCASGDCGGRLQCNGAGGAPPATLA  
QFEVHHGSNDYASYGVSLVDGFNVPMTVTPHEGKGVCPVVGCRDDLLATCPHVL  
QHRVPAVHGPVVACKSGCEAFHTDELCCRNHFNNPSTCKGSIYSSFFKHAYPATFTF  
AHDTPSLMHQCSPRELKVIFCH

>CrOLP XP\_006294865.1 Capsella rubella

MAQTSPLAASFLLISFSSAADTGRLFLTVVNNCPFTVWPAIQPNAGHPVLEKGGF  
ALPTFTHRSFSAPTTHWSGRIWARTGCAHYNGKFSCITGDCGNRLECNGLGATPA

SLAQFDLHHGGHKDFSSYGVSLVDGYNVPMTPHEGHGVCVVGCREDLLKSCP  
AHLQVRSHSGHVVACKSGCEAFRSDELCCRGHYNSPNTCKASSHSLFFKHACPSTF  
TFAHDSPSLMHDCSSPRELKVIFCH

>NaOLP XP\_019237711.1 Nicotiana attenuata

MASSSTKTLTSLSLFLTLALSQATYSGLILTLVNNCPYTIWPAIQPNAGHPVLERGG  
FALHTLTHRSFAAPTTHWSGRIWARTGCSYAHGKFNCATGDCGGRIECDGLGGAAP  
ATLAQFALHHGHADFSSYGVSLVDGFNIPLTVTPHEGKGQCPVVGCRAEILQTCPAV  
LQLRSHGGHGPVVGCKSGCEAFKTDELCCRNHFNSPQTCKGSSYSEFFKHACPATF  
TYAHDSPSLMHECSPRELKVIFCH

>MdOLP XP\_008357503.1 Malus x domestica

MAVSRSHFHSPLLSATTFLILAAVVHATHPQPSILTLVNNCPFIWPAIQPNAGHPVL  
ERGGFFLNALTHRSFPAPTQPWSGRIWARTHCTQNGPHLSCLTGDCGGRLECNGAG  
GATPSTLAQISLHHGGPADLFSYGVSLVDGFNVPLTVTPHEGHGVCVVGCKANLL  
ATCPDRLKVTSPKGVVACKSACEAFGTDELCCRNHYNSPQTCRASGYSQFFKQACP  
TTTFAHDSPTLMHQCSSPRELKVIFCH

>DcatOLP XP\_020683326.1 Dendrobium catenatum

MLPFFPLLSLLLISLPPPTFSQYPPSILTIVNNCPFTICPAIAPNSGHDVLEHGGFCLPTL  
SHRSFPAPTHHWSGRIWGRTGCTHTGTHFSCATGDCGNRLECSGFTGATPATLAQLT  
LHHGGHRDLVSYAVSLVDGFNLPMTPHEGRGLCPVVGCREDLSTCPPELQVRF  
PAGGSVVGCKSGCAAYGTDELCCRNMYNSPKTCRASTYSEFFKHHCPATFTYAHS  
PSLTHDCEGPKELKVIFCH

>SIOLP NP\_001234714.1 Solanum lycopersicum

MASSSAKILLPLSLLFTLLSLSQSTNPNFILTLVNNCPYTIWPAIQPNAGHPVLERGGF  
TLHSLTHRSFPAPNAHWSGRIWARTGCNYQHGFYCATGDCGGRIECDGLGGAAP  
ATLAQFVLHHGHADFSTYGVSLVDGFNIPLTVTPHEGKGVCVVGCRANLLESCPA  
VLQFRSHGGHGPVVGCKSACEAFKSDEFCCRNHYNSPQTCKPSSYSQFFKHACPAT  
FTYAHSPLMHECSPRELKVIFCH

Table S7. Anatomical characteristics of stem cross-section of the *PdOLP1* transgenics and wildtype plants.

| Poplar line            | Phloem                |            | Cambium               |            | Xylem                 |            | Width ratio of xylem /phloem |
|------------------------|-----------------------|------------|-----------------------|------------|-----------------------|------------|------------------------------|
|                        | Number of cell layers | Width (μm) | Number of cell layers | Width (μm) | Number of cell layers | Width (μm) |                              |
| Non-transgenic poplar  | 30-33                 | 359.01     | 6-8                   | 34.13      | 53-57                 | 661.17     | 1.84                         |
| <i>PdOLP1</i> -OE OE3  | 28-31                 | 311.81     | 5-7                   | 29.89      | 43-48                 | 527.99     | 1.69                         |
| <i>PdOLP1</i> -OE OE12 | 29-31                 | 331.53     | 5-7                   | 31.32      | 43-49                 | 541.23     | 1.63                         |
| <i>PdOLP1</i> -OE OE21 | 29-32                 | 339.68     | 6-7                   | 32.74      | 44-49                 | 552.28     | 1.63                         |
| <i>PdOLP1</i> -DR DR8  | 34-37                 | 393.15     | 7-9                   | 37.18      | 60-66                 | 727.49     | 1.85                         |
| <i>PdOLP1</i> -DR DR15 | 34-38                 | 402.05     | 7-10                  | 39.04      | 60-67                 | 763.45     | 1.90                         |
| <i>PdOLP1</i> -DR DR32 | 34-38                 | 411.05     | 7-10                  | 40.28      | 61-67                 | 785.81     | 1.91                         |

Notes :

*PdOLP1*-OE, *PdOLP1*-overexpressing lines; *PdOLP1*-DR, *PdOLP1*-downregulated lines. Cell layers, stems thicken by cell proliferation within the vascular cambium. The vascular cambium increases the number of cell layers in the phloem or xylem zones through periclinal division. The xylem and phloem regions show an orderly radial arrangement, so the cell layers can be accurately counted (see Figure 5a-f).

Table 8 Dry weight biomass, wood density and carbon storage of transgenic poplar and control plants

| Poplar line            | Dry weight biomass (g) | Wood density unit: (g·cm <sup>-3</sup> ) | Carbon storage (m <sup>3</sup> ) |
|------------------------|------------------------|------------------------------------------|----------------------------------|
| Non-transgenic poplar  | 46.13                  | 0.76                                     | 0.137                            |
| <i>PdOLP1</i> -OE OE3  | 34.61                  | 0.57                                     | 0.101                            |
| <i>PdOLP1</i> -OE OE12 | 35.89                  | 0.62                                     | 0.103                            |
| <i>PdOLP1</i> -OE OE21 | 36.67                  | 0.64                                     | 0.109                            |

|                        |       |      |       |
|------------------------|-------|------|-------|
| <i>PdOLP1</i> -DR DR8  | 57.54 | 0.89 | 0.174 |
| <i>PdOLP1</i> -DR DR15 | 59.66 | 0.91 | 0.181 |
| <i>PdOLP1</i> -DR DR32 | 62.77 | 0.94 | 0.186 |

Measurements were conducted on transgenic poplar plants overexpressing *PdOLP1* (OE3, OE12 and OE21), and *PdOLP1* downregulated plants (DR8, DR15 and DR32) and Non-transgenic poplar plant. The results are given as means  $\pm$  SD of three independent assays. Asterisks indicate significant differences ( $P < 0.05$ ) when compared with the control plants

Table S9. Binding sites in the promoter of the *PdOLP1* gene recognized by bZIP, WRKY, BLH, bHLH and MYB transcription factors.

The promoter of poplar *PdOLP1*

>*PdOLP1* promoter

ACGGCCCGGGCTGGTATCCCTCTTCGCCACCGTGTGTGTCGCCGACCACTGTTACCTCGATCTAA  
AACACTCCTCTCTTTCTCTCAAGAATAACCCTCGGGGTTTTACACTGAACTCCATGGACATGAA  
TTTTGCTTCCAATTAACGAAGTGCATGAAAATATTGACCTGAATTAATTTGTGGATAGACGA  
CCAGCTAATTGAAAATATCGTTGAAAGAAACCATTTAAAATATCGTTTCCTTACTTAGTTTTCGT  
GTGTGTGATTAGTGGTTTTTTAAAATATCGCACTACATTATAAACATTATTTTTTAAAAAATAA  
CACAGTTTGGTAAAAAATTGAAAGAATAATATATATTGAAAAAATATTTAGAAAATATTATAA  
TTTTAAAATAACTATGTTTTTTAATATTGTTTTGTCCACCGCTGTATATCATGGTTGTTAGTTA  
TATTTCAAGATGCATATTTTTTTAAAATAATTAACCTAAACCAAAGTTATCCCAAGAAAGATT  
TTATGAAGATTTAATGTCAAAAAATGGCTACTATTTAATTACTGTAAAAATAGCTACTATTTAA  
TAACTGTAAATTACTGTCAAAAAATAGATTTAATGGTCAAGATTTTATCACTGTGTTAGAAGTGT  
AAAACACTCTTACATCGCAACTCGCTAATTAATTGTCCTGCACTGCCAATTCGACATGTA  
ACACAGAACAACAGCGCGGTGTCGTTAGGATGGAAAGAAGGCACTGGCGATGGGTCCCA  
TCCCACGCTGCATATATACACGTATTACTTTTTCTCTTCTCACTTTGGCCTCTGCCTTTCCTTTT  
GTTTTAAATTTGAACTGTGTTTGTGTTTATCGAATCAGACCTCAGTACTGCTAAGATTGTGTTGG  
GGAAGATGGTAGATGTCGAGGGTGTGCATGGATCCACAGAAAAAGCACGAAAAAACACGAA  
AAGCTTATTTTTTATAGATAAGATTTTTATACATAGTTGAGTTGTACCTAACATCATCAATCTCGA  
ACAGATGATGCTAGAACACTGATATGAGAAAACGAGGCCAATCCGAATCTACTTTATTAAAAAA  
AAAATGCAAGCAAAAAGTTAAAGTTTACCACATTCCATGCTCTTTACAATGCTTCTTTATTAATT  
ATTTAATTGTTTTGTTTTATTACTCTTAACTTATCCATTCTAAATAACAGTTTGCAAATTA  
GGCACACAGGAAGCAAAATTTCTCAATGCTAAAATCAACTTACGGCCATTAACCAATATCAAAT  
CTCTTCTTCGCATTCAAATAGCTATTAGTCTGTAGGAAAAAATAAACATATGATTAGTTCT  
ACGATTTTTTACATTTTTTTCCTAAATGATTAATAATGCCACCACCTTCACGATGCTATAGGT  
AGATGCACAAACTACAGAGTAATGGCGGCTTCTTCAAAAGCTCCAAAGCCAGAAGAATCCCC  
TCCAATTTGCCCTTGGCATATTTGGCTCCTGCATAATTCTAAGCTTCAATCCTTCTAACCAA  
CTTTCAAACCAGAGGTATTCTAATTAATTGTAGTCGGCAGGGAAAGCTTTCTGAATTCCAGG  
CTCAAGCCCTCAGAATTCAAAAGGACTAAAATACGTGCATCCTCATCTGAAAATACACAAAAGC  
ACTCCAAAAGCACATCTTCACCTTCTCCCTCCCCACTCAACATTTAAGGAGAGGGGTATGTAT

GGTATTACGACATCACCCACAGAGGAAAAGAGAAAAGCTCGAAATCATGCATTCTTATCTCAAA  
 CCCTCGA **TGAC**TATAAGTAGTACACTTCCGGC **ACACTTG**TCTCTTGAACCAAAAAGGAAAAA

BLH, WRKY, bZIP, MYB, and bHLH binding sites in promoter of *PdOLP1*.

| Gene name     | BLH binding site        | WRKY binding site         | bZIP binding site           | bHLH binding site          | MYB binding site            |
|---------------|-------------------------|---------------------------|-----------------------------|----------------------------|-----------------------------|
| <i>PdOLP1</i> | TGCA<br>(marked in red) | TGAC<br>(marked in green) | ACACNNG<br>(marked in pink) | CANNTG<br>(marked in blue) | TATCC<br>(marked in yellow) |
